# Supplementary material for: Estimating the Prevalence of Cardiac Amyloidosis in Old Patients with Heart Failure—Barriers and Opportunities for Improvement: The PREVAMIC Study
Source: MDPI journal article supplement (doi:10.3390/jcm12062273), 2023-03-15
Supplement: s1 [file s1]

## Supplementary Materials:

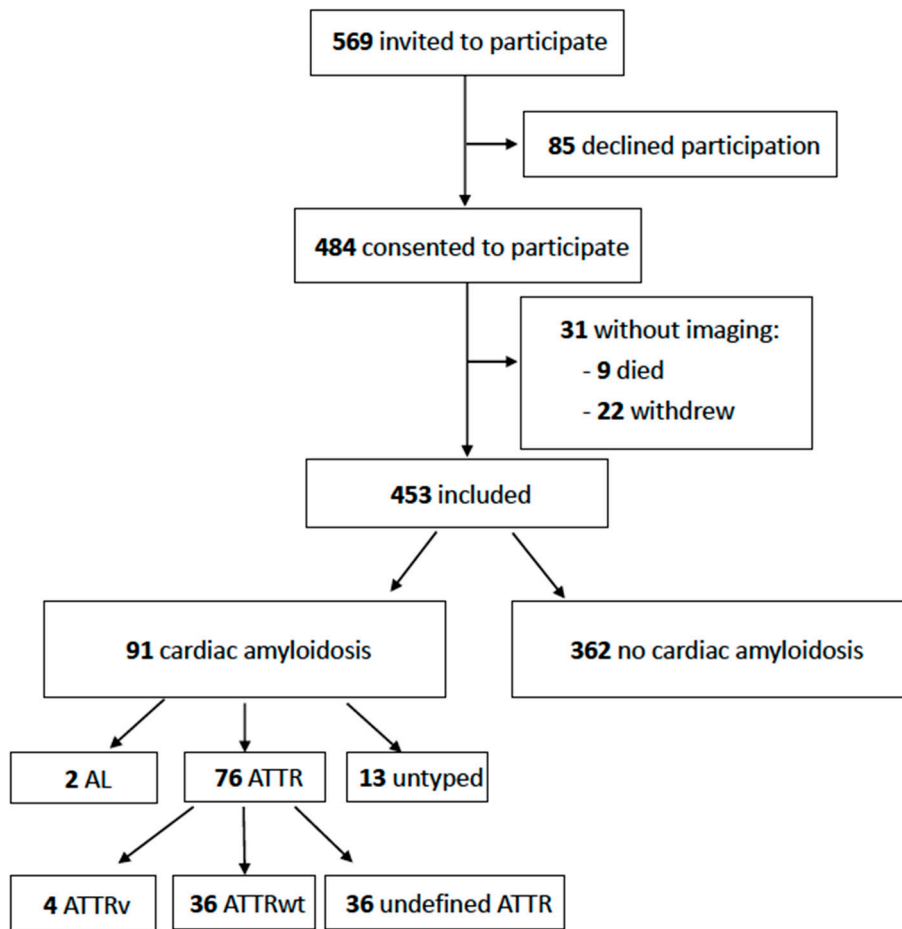

Figure S1: Study flowchart

Table S1: Prevalence studies evaluating amyloidosis as a cause of heart failure

| Author (year of publication)       | Type of study             | Patients (n)                | Age                                 | Inclusion criteria                                            | Prevalence                      | Diagnostic method                                   | Type of amyloid protein studied |
|------------------------------------|---------------------------|-----------------------------|-------------------------------------|---------------------------------------------------------------|---------------------------------|-----------------------------------------------------|---------------------------------|
| González-López (2015) <sup>8</sup> | Prospective Single-centre | 120                         | 82 ± 8                              | ≥ 60 years<br>HFpEF<br>Left ventricular thickness ≥ 12 mm     | 13.3%                           | <sup>99m</sup> Tc-DPD                               | ATTR                            |
| Mohammed (2014) <sup>16</sup>      | Prospective Single-centre | HFpEF: 109<br>Controls: 131 | HFpEF: 76 ± 13<br>Controls: 69 ± 16 | Patients with HF and LVEF > 40%<br>Control group (without HF) | HFpEF: 17%<br>Control group: 5% | Autopsies                                           | ATTR                            |
| Lindmark (2021) <sup>17</sup>      | Prospective Single-centre | 174                         | 76.5 ± 12.7                         | HF with left ventricular thickness > 14 mm.                   | 20%                             | <sup>99m</sup> Tc-DPD + study of monoclonal protein | ATTR                            |
| Hahn (2020) <sup>18</sup>          | Prospective Single-centre | 108                         | 66 (57-74)                          | HFpEF (LVEF ≥ 50%)                                            | 14%                             | Endomyocardial biopsy                               | ATTR, AL and AA                 |
| Devesa (2021) <sup>19</sup>        | Prospective Single-centre | 58                          | 79 (75-85)                          | ≥ 18 years<br>HFpEF (LVEF ≥ 50%)                              | 5.2%                            | <sup>99m</sup> Tc-DPD + study of monoclonal protein | ATTR                            |

|                                    |                               |                                 |                                            |                                                                                                 |                                 |                                                                                    |             |
|------------------------------------|-------------------------------|---------------------------------|--------------------------------------------|-------------------------------------------------------------------------------------------------|---------------------------------|------------------------------------------------------------------------------------|-------------|
| Left ventricular thickness <12 mm. |                               |                                 |                                            |                                                                                                 |                                 |                                                                                    |             |
| AbouEzzeddine (2021) <sup>20</sup> | Population-based cohort study | 1235 (total)<br>286 (screening) | Total: 80 (72-87)<br>Screening: 78 (71-84) | ≥ 60 years<br>HFpEF (LVEF ≥ 40%)<br>Left ventricular thickness ≥ 12mm<br>Southeastern Minnesota | 1,3% (Total)<br>6,3%(Screening) | Pyrophosphate scan + study of monoclonal protein                                   | ATTR        |
| López-Sainz (2019) <sup>21</sup>   | Prospective Single-centre     | 143                             | 79 ± 9                                     | ≥ 60 years<br>HF with LVEF < 50% + left ventricular thickness ≥ 12mm or conduction disorders    | 4%                              | <sup>99m</sup> Tc-DPD + study of monoclonal protein                                | AL and ATTR |
| Ussitalo (2022) <sup>22</sup>      | Retrospective Multi-centre    | 355                             | 80 ± 6                                     | > 70 years<br>HF + scintigraphy performed for non-cardiac reason                                | 7%                              | <sup>99m</sup> Tc-HMDP                                                             | ATTR        |
| Ruiz-Hueso (Current study, 2022)   | Prospective Multi-centre      | 453                             | 85 [79-88]                                 | ≥ 65 years<br>HF with any LVEF value<br>Left ventricular thickness > 12 mm                      | 20.1%                           | <sup>99m</sup> Tc-DPD/PYP/HMDP + study of monoclonal protein<br>Biopsy if required | AL and ATTR |

AA: secondary amyloidosis; AL: light chain amyloidosis; ATTR: Transthyretin amyloidosis; HF: Heart failure;

HFpEF: heart failure with preserved ejection fraction, LVEF: left ventricular ejection fraction

**Table S2: Biopsies performed: location and result**

| BIOPSIES                    | n = 56    |
|-----------------------------|-----------|
| <b>Location</b>             |           |
| Skin (%)                    | 3 (5.3)   |
| Abdominal fat (%)           | 36 (64.3) |
| Bone marrow (%)             | 7 (12.5)  |
| Rectal mucosa (%)           | 1 (1.8)   |
| Salivary gland (%)          | 8 (14.3)  |
| Endomyocardial (%)          | 1 (1.8)   |
| <b>Result</b>               |           |
| Light chain amyloidosis (%) | 2 (3.6)   |
| Untyped positive (%)        | 5 (8.9)   |
| Negative (%)                | 49 (87.5) |

\*In some patients, more than one biopsy was performed

**Table S3: Cardiac magnetic resonance imaging**

| <b>CARDIAC MAGNETIC RESONANCE IMAGING</b> | <b>n = 51</b> |
|-------------------------------------------|---------------|
| <b>Late enhancement</b>                   |               |
| Absent (%)                                | 47 (92.1)     |
| Subendocardial (%)                        | 3 (5.9)       |
| Transmural (%)                            | 1 (2)         |
| <b>T1 mapping</b>                         |               |
| Typical of amyloidosis (%)                | 3 (5.9)       |
| Nonspecific (%)                           | 23 (45.1)     |
| Not performed (%)                         | 25 (49.0)     |
